# Supplementary material for: The impact of hypocrisy on opinion formation: A dynamic model
Source: PubMed Central journal article supplement (PMC6594623; doi:10.1371/journal.pone.0218729), 2019-06-26
Supplement: pone.0218729.s001.pdf [file pone.0218729.s001.pdf]

# The impact of hypocrisy on opinion formation

## Supporting information 1

Michael T. Gastner<sup>1,2\*</sup>, Károly Takács<sup>2,3</sup>, Máté Gulyás<sup>2,4</sup>, Zsuzsanna Szvetelszky<sup>2</sup>, Beáta Oborny<sup>4,5</sup>

<sup>1</sup> Division of Science, Yale-NUS College, Singapore

<sup>2</sup> MTA TK “Lendület” Research Center for Educational and Network Studies (RECENS), Hungarian Academy of Sciences, Budapest, Hungary

<sup>3</sup> The Institute for Analytical Sociology (IAS), Linköping University, Norrköping, Sweden

<sup>4</sup> Department of Plant Taxonomy, Ecology and Theoretical Biology, Biological Institute, Loránd Eötvös University (ELTE), Budapest, Hungary

<sup>5</sup> GINOP Sustainable Ecosystems Group, Centre for Ecological Research, Hungarian Academy of Sciences, Tihany, Hungary

\* michael.gastner@yale-nus.edu.sg

## Appendix: derivation of equations 5 and 6

In the CVM, the state of the system can be characterized by the abundance of both types of hypocrites ( $\rho_{Rb}$  and  $\rho_{Br}$ ) and red frank individuals ( $\rho_{Rr}$ ). In one update, these variables change by at most  $\pm 1/N$ , where  $N$  is the number of individuals in the group. Suppose the previous state is  $(\rho_{Rb}, \rho_{Br}, \rho_{Rr})$ . There are eight possible events that cause a change from  $(\rho_{Rb}, \rho_{Br}, \rho_{Rr})$ . We list these events in Table S1.1 together with the corresponding transition rates. The rates are those of the CVM on a complete graph with self-links (i.e., we include a link from each node to itself). If we exclude the self-link, the transition rate  $c$  will have to be replaced by  $c \frac{N}{N-1}$ . Keeping the factor  $\frac{N}{N-1}$  throughout the calculation would complicate the mathematical expressions without additional insight into the model. The “correction factor”  $\frac{N}{N-1}$  is close to 1 even for moderately small groups and goes to zero in the limit  $N \rightarrow \infty$ .

We can express the dynamics of the expected values  $\overline{\rho_{Rb}}$ ,  $\overline{\rho_{Br}}$  and  $\overline{\rho_{Rr}}$  by rate equations. For example,  $\rho_{Rb}$  increases by  $\frac{1}{N}$  because of event 7 in Table S1.1, whereas events 1, 2, and 6 decrease  $\rho_{Rb}$  by the same amount. None of the other events change  $\rho_{Rb}$ . Taking the rates of the corresponding events into account,  $\overline{\rho_{Rb}}$  evolves according to the differential equation

$$\frac{d\overline{\rho_{Rb}}}{dt} = c \overline{\rho_{Bb}} \overline{\rho_R} - e \overline{\rho_{Rb}} - i \overline{\rho_{Rb}} - c \overline{\rho_{Rb}} \overline{\rho_B} . \quad (\text{S1.1})$$

Similar arguments show that

$$\frac{d\overline{\rho_{Br}}}{dt} = c \overline{\rho_{Rr}} \overline{\rho_B} - e \overline{\rho_{Br}} - i \overline{\rho_{Br}} - c \overline{\rho_{Br}} \overline{\rho_R} \quad (\text{S1.2})$$

and

$$\frac{d\overline{\rho_{Rr}}}{dt} = i \overline{\rho_{Rb}} + e \overline{\rho_{Br}} + c \overline{\rho_{Br}} \overline{\rho_R} - c \overline{\rho_{Rr}} \overline{\rho_B} . \quad (\text{S1.3})$$

**Table S1.1.** Transition rates in the CVM on a complete graph with self-links.

|   | Event                                      | New state                                                       | Transition rate     |
|---|--------------------------------------------|-----------------------------------------------------------------|---------------------|
| 1 | An $Rb$ individual externalizes            | $(\rho_{Rb} - \frac{1}{N}, \rho_{Br}, \rho_{Rr})$               | $eN\rho_{Rb}$       |
| 2 | An $Rb$ individual internalizes            | $(\rho_{Rb} - \frac{1}{N}, \rho_{Br}, \rho_{Rr} + \frac{1}{N})$ | $iN\rho_{Rb}$       |
| 3 | A $Br$ individual externalizes             | $(\rho_{Rb}, \rho_{Br} - \frac{1}{N}, \rho_{Rr} + \frac{1}{N})$ | $eN\rho_{Br}$       |
| 4 | A $Br$ individual internalizes             | $(\rho_{Rb}, \rho_{Br} - \frac{1}{N}, \rho_{Rr})$               | $iN\rho_{Br}$       |
| 5 | An $Rr$ individual copies a $B$ individual | $(\rho_{Rb}, \rho_{Br} + \frac{1}{N}, \rho_{Rr} - \frac{1}{N})$ | $cN\rho_{Rr}\rho_B$ |
| 6 | An $Rb$ individual copies a $B$ individual | $(\rho_{Rb} - \frac{1}{N}, \rho_{Br}, \rho_{Rr})$               | $cN\rho_{Rb}\rho_B$ |
| 7 | A $Bb$ individual copies an $R$ individual | $(\rho_{Rb} + \frac{1}{N}, \rho_{Br}, \rho_{Rr})$               | $cN\rho_{Bb}\rho_R$ |
| 8 | A $Br$ individual copies an $R$ individual | $(\rho_{Rb}, \rho_{Br} - \frac{1}{N}, \rho_{Rr} + \frac{1}{N})$ | $cN\rho_{Br}\rho_R$ |

We can express the right-hand sides of Eqs S1.1–S1.3 in terms of only  $\rho_{Rb}$ ,  $\rho_{Br}$  and  $\rho_{Rr}$  by using the identities  $\rho_R = \rho_{Rb} + \rho_{Rr}$ ,  $\rho_B = 1 - \rho_{Rb} - \rho_{Rr}$  and  $\rho_{Bb} = 1 - \rho_{Rb} - \rho_{Br} - \rho_{Rr}$ . The result is the following set of equations:

$$\frac{d\overline{\rho_{Rb}}}{dt} = c(\overline{\rho_{Rb}} + \overline{\rho_{Rr}}) (1 - \overline{\rho_{Br}} - \overline{\rho_{Rr}}) - (c + e + i)\overline{\rho_{Rb}}, \quad (\text{S1.4})$$

$$\frac{d\overline{\rho_{Br}}}{dt} = c(\overline{\rho_{Br}} + \overline{\rho_{Rr}}) (1 - \overline{\rho_{Rb}} - \overline{\rho_{Rr}}) - (c + e + i)\overline{\rho_{Br}}, \quad (\text{S1.5})$$

$$\frac{d\overline{\rho_{Rr}}}{dt} = c(\overline{\rho_{Rb}} + \overline{\rho_{Rr}}) (\overline{\rho_{Br}} + \overline{\rho_{Rr}}) - c\overline{\rho_{Rr}} + e\overline{\rho_{Br}} + i\overline{\rho_{Rb}}. \quad (\text{S1.6})$$

We obtain the evolution of the difference  $\overline{D} = \overline{\rho_{Rb}} - \overline{\rho_{Br}}$  by subtracting Eq S1.5 from S1.4,

$$\frac{d\overline{D}}{dt} = -(e + i)\overline{D}, \quad (\text{S1.7})$$

which explains Eq 6 in the main text. We can also infer the shape of the attractor (black curve in Fig 3) by setting the derivatives on the left-hand side of Eqs S1.4–S1.6 equal to zero. It follows that the attractor is given by Eq 5.
